# Supplementary material
Source: PubMed Central journal article supplement (PMC7540132)
Supplement: ajtr0012-5655-f6.pdf [file ajtr0012-5655-f6.pdf]

QLQX prevent RV remodeling by inhibiting apoptosis and improving metabolism

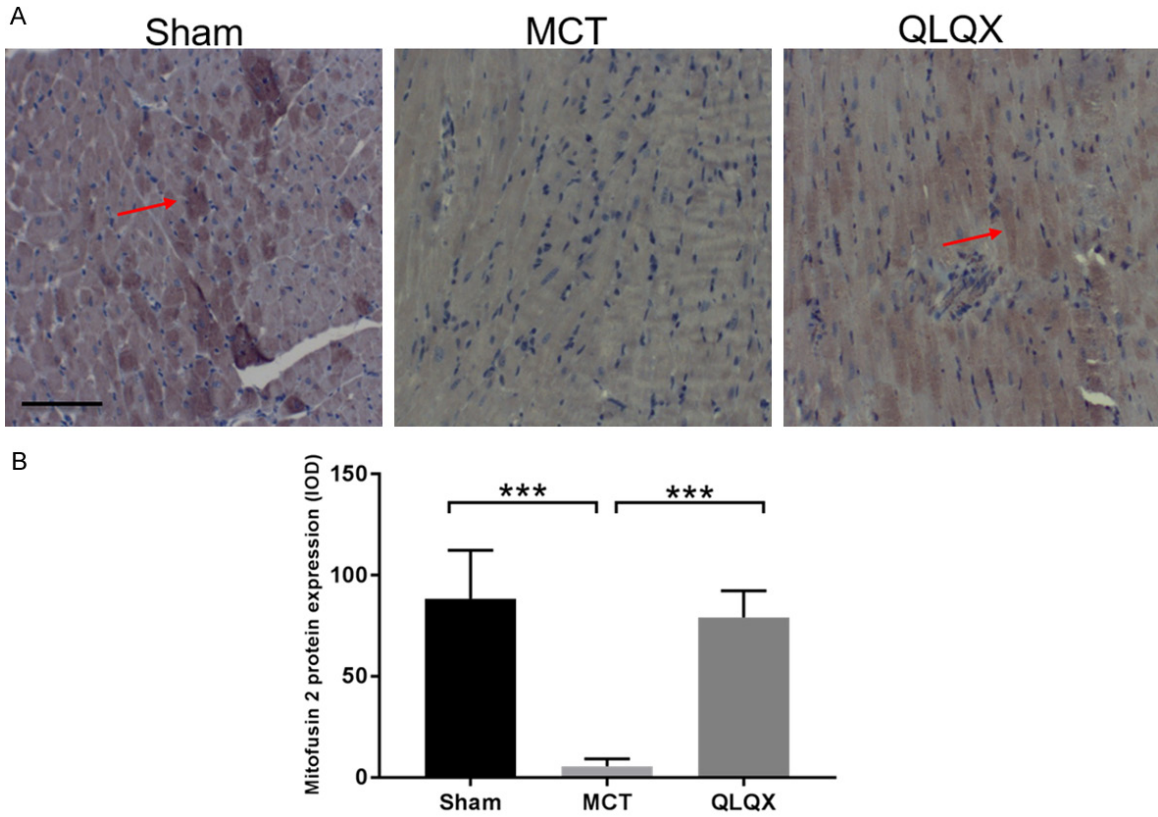

**Figure S1.** The expression levels of MFN2 in RV tissues. A. Representative images of immunohistochemical staining using MFN2 antibody as indicated (red arrows). Original magnification, 100×; scale bar, 50 μm. B. The quantification analysis of the MFN2 immunoactive positive cells in RV tissues in three group. Data is presented as mean ± SD. \*\*\*P<0.0001.

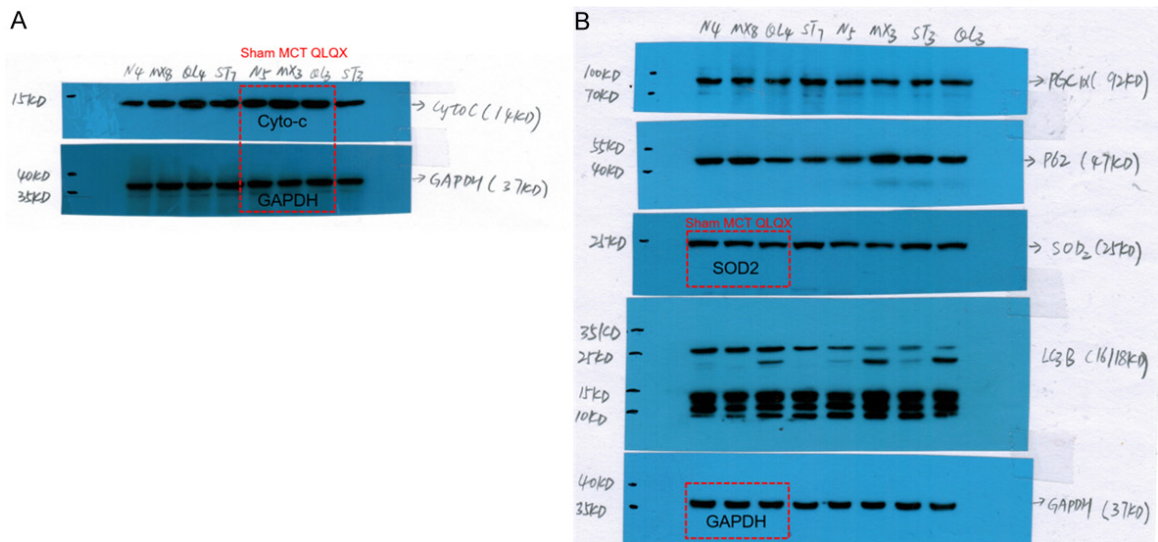

**Figure S2.** Photographs of the original western blot membranes showing expression levels of Cyto-c and SOD2. The red dotted box in (A) represents Cyto-c and GAPDH. The red dotted box in (B) respectively represents SOD2 and GAPDH.
